# Supplementary material for: High genome heterozygosity and endemic genetic recombination in the wheat stripe rust fungus
Source: PubMed Central journal article supplement — Nat Commun. 2013 Oct 23;4:2673. doi: 10.1038/ncomms3673 (PMC3826619; doi:10.1038/ncomms3673), 2013-10-23
Supplement: ncomms3673-s1.pdf [file ncomms3673-s1.pdf]

## Supplementary Figures

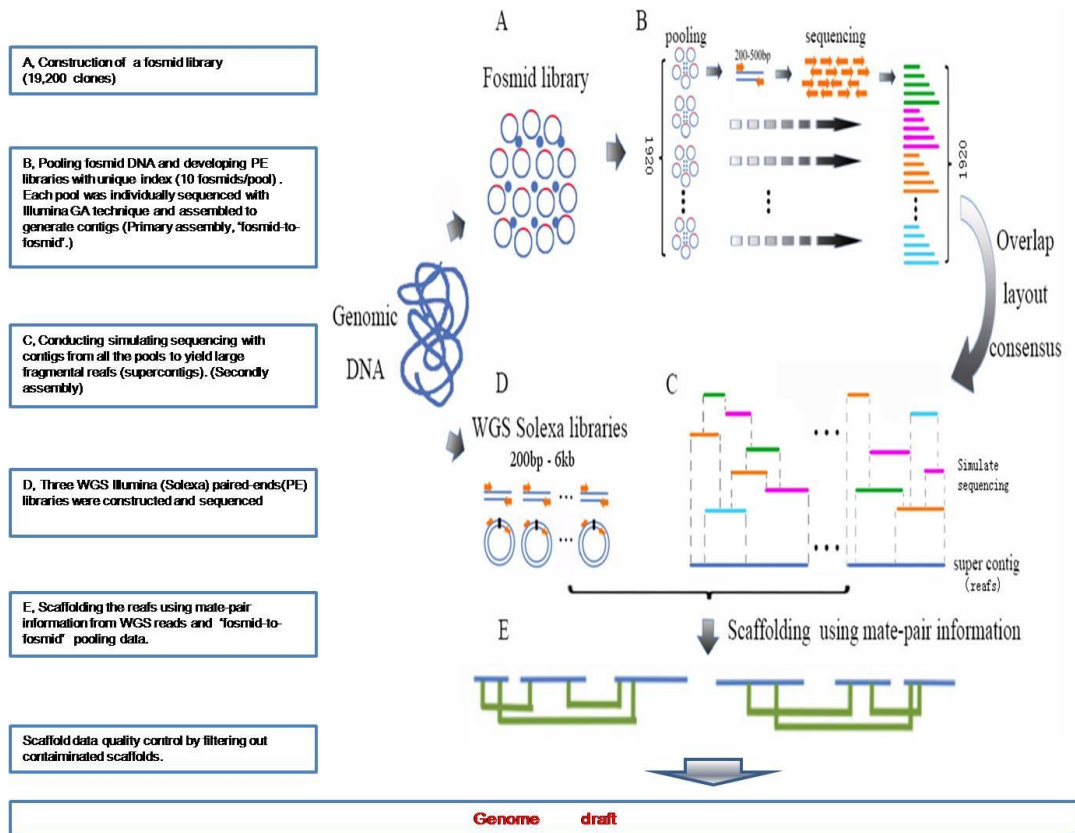

### Supplementary Fig. S1 | Diagram of *Pst* genome sequencing and assembly using a ‘fosmid to fosmid’ strategy.

**Fosmid pooling and sequencing:** Fosmid library was constructed according to Kim *et al* and randomly divided to clone pools (10 fosmids/pool). In total, 1,920 pools containing 19,200 fosmid clones were created for Illumina sequencing. For each pool with unique index, one 170-bp and one 500-bp insert libraries were constructed. Libraries were then bar-coded and paired-end sequenced in a lane on the Illumina sequencing platform.

**The primary assembly for each pool independently:** First, the reads in a pool were assembled using SOAPdenovo into contigs and scaffolds via various combination of parameters with *k*-mer set from 23 to 63. As a result, a contig N50 of 4.7-kb and scaffold N50 of 21.4-kb were achieved after gap filling by combining assemblies from all the 1,920 pools.

**Secondary assembly to create large reafs (super-contigs):** The resulted contigs (total length of 728.14-Mb) with a N50 size of 4.7-kb were then taken as ‘simulate reads’ for secondary assembly (simulating sequencing) to generate large reafs using Celera assembler, which is an Overlap Layout Consensus (OLC) assembler.

**Scaffolding of all reafs:** The virtual paired-end reads artificially extracted from assembled scaffolds of each pool with insert size from 50-bp to 37.5-kb, and the paired-end reads of Illumina sequencing for WGS PE libraries (200-bp to 6-kb inserts) were used for scaffolding of all reafs by SOAPdenovo\_scaffolder.

The assembled scaffolds were searched against nt database to remove contaminations from plant, bacteria, and insects. The final combined length of assembled scaffolds was 130.7-Mb. The N50 of scaffolds and contigs reached 125-kb and 18-kb, respectively.

a)

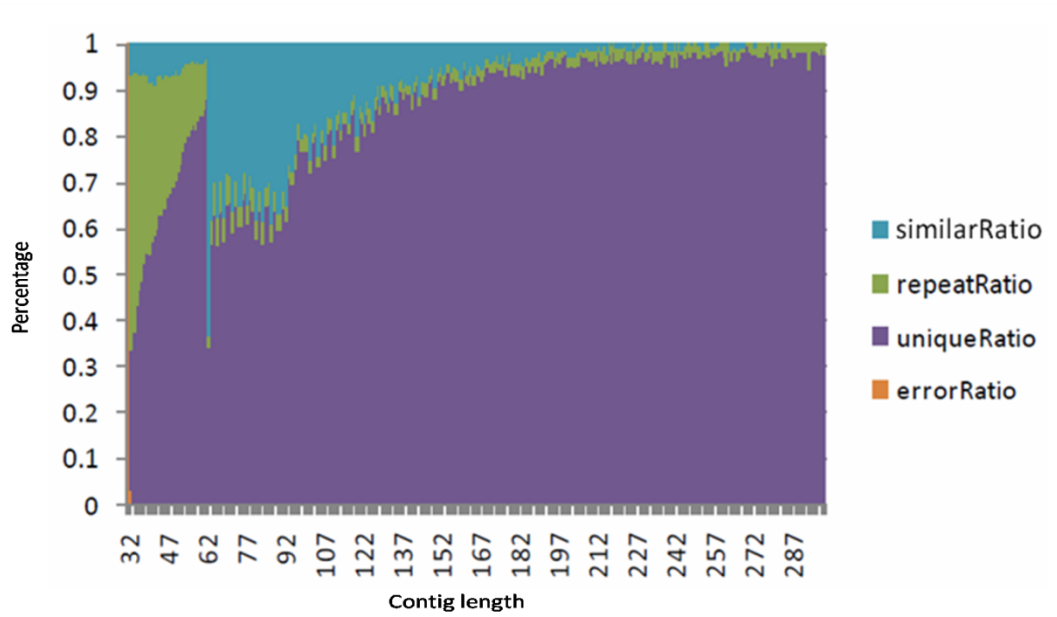

b)

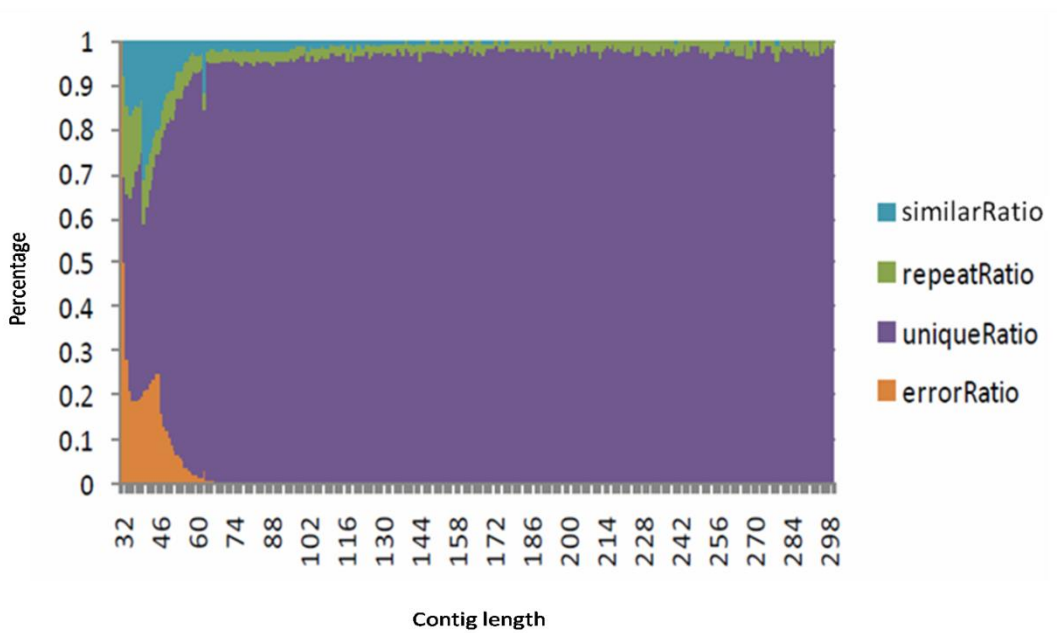

**Supplementary Fig. S2 | Similar contig analysis of the *Pst* genome and human genome.** By comparing the results of contig analysis for the *Pst* (a) and human (b) genomes, a manifest trend can be observed that the ratio of similar contigs in the *Pst* genome is significantly higher than that in the human genome, indicating a higher heterozygosity in the *Pst* genome. For estimating the ratio of different contig types with different lengths, the AvgCvg of depth of  $<0.1$  fold and  $>1.8$  folds was considered as error and repeats, respectively. Comparison of same length contigs was done for all contigs with depth of 1.8 folds  $\cong$  AvgCvg  $\cong$  0.1 folds. Contigs with similarity of  $\cong 0.95$  were selected as similar contigs, the remaining ones were selected as unique contigs.

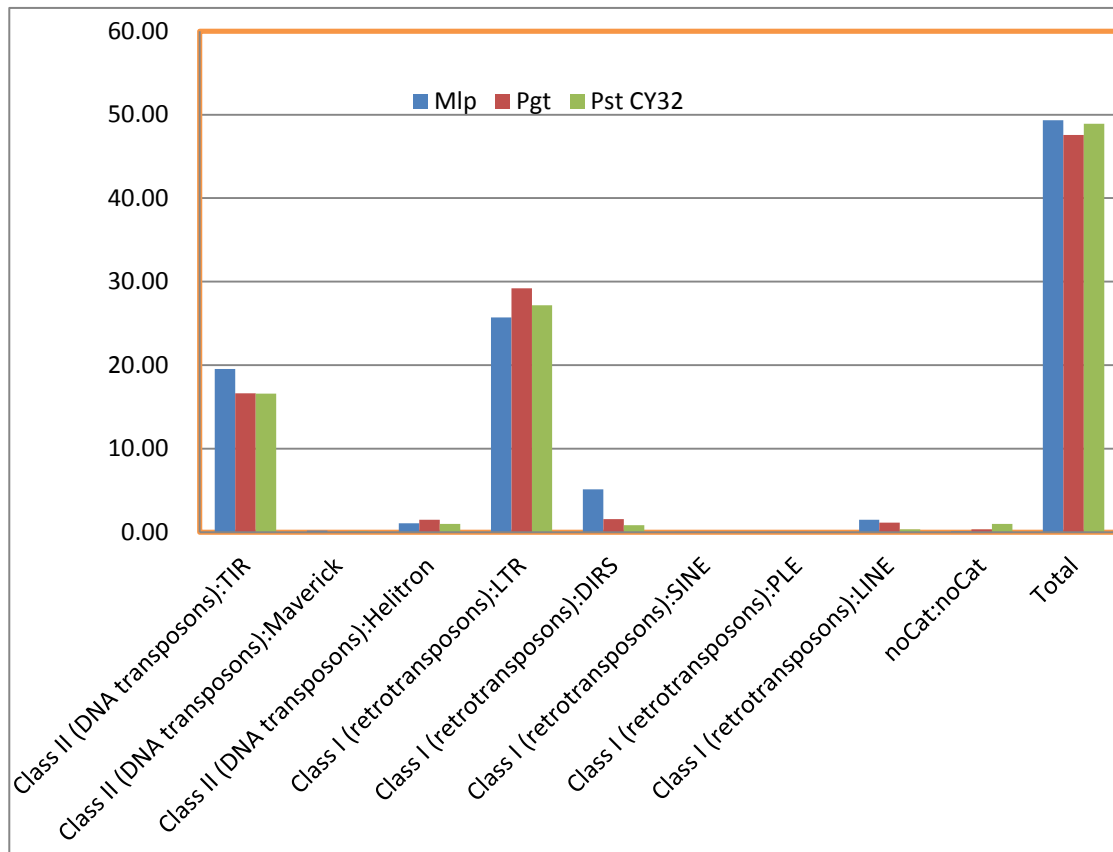

**Supplementary Fig. S3 | Distribution of repetitive sequence elements in three rust fungal genomes.** The result shows similar distribution patterns for the percentages of repetitive sequences in the genomes of *Puccinia striiformis* f. sp. *tritici* (*Pst*), *Puccinia graminis* (*Pgt*) and *Melampsora larici-populina* (*Mlp*), and all of them consist of high proportion for repetitive sequences. The repetitive sequences were identified by knowledge-based or de novo prediction with the REPET pipeline.

a)

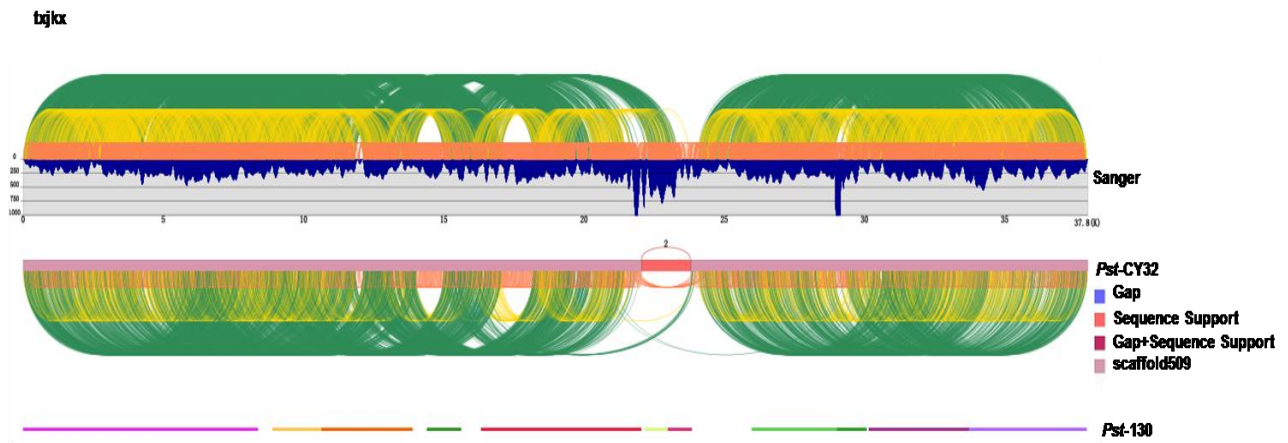

b)

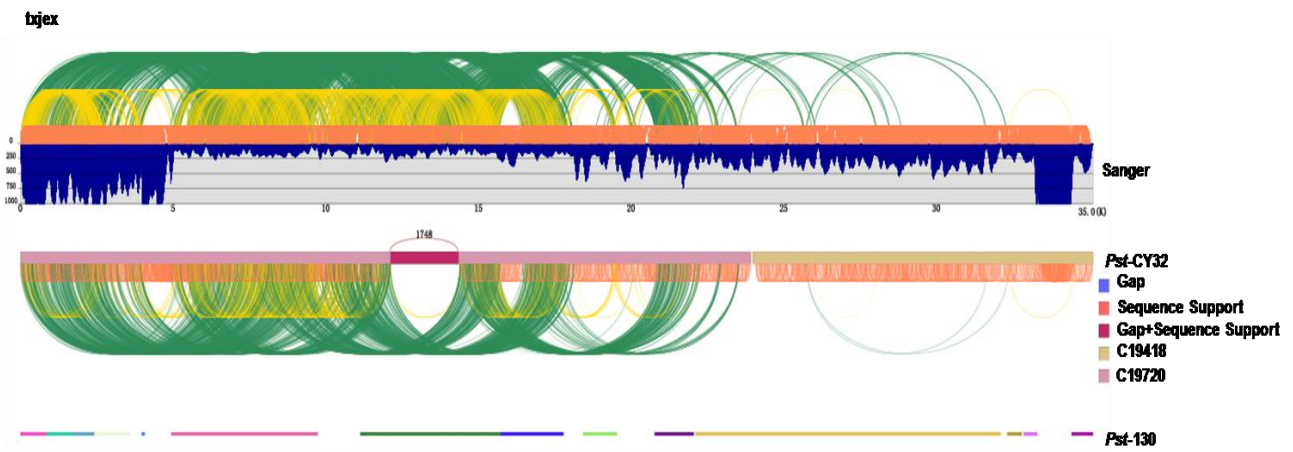

c)

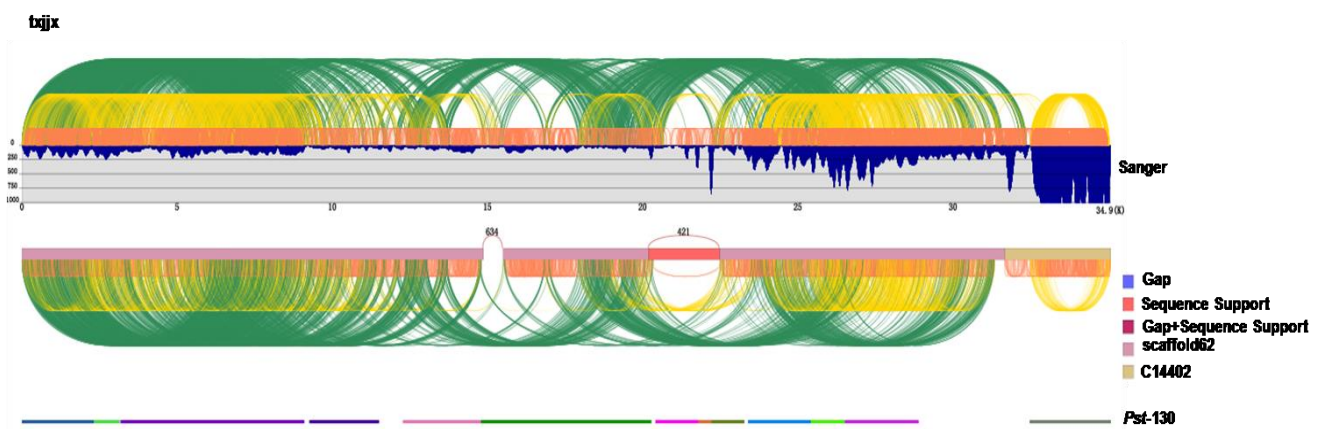

d)

**bjgx**

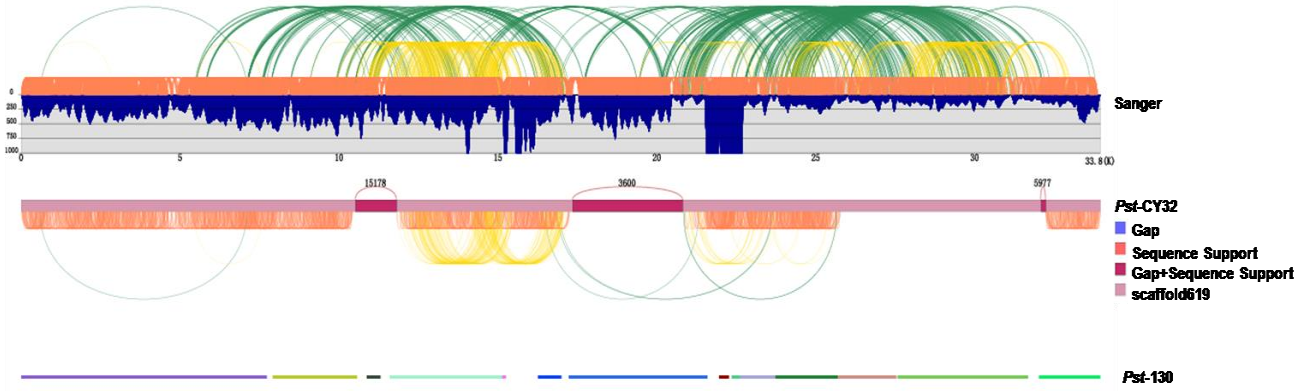

**e)**

**bjfx**

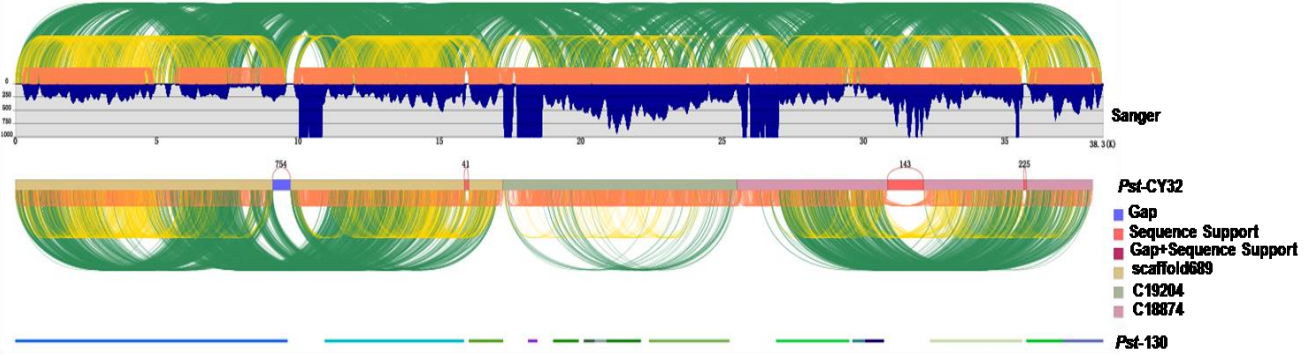

**f)**

**bjdx**

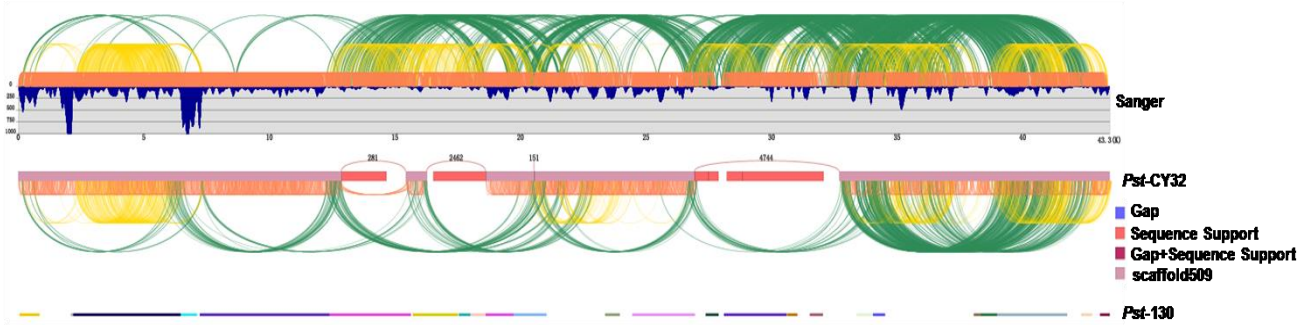

**g)**

**bjcx**

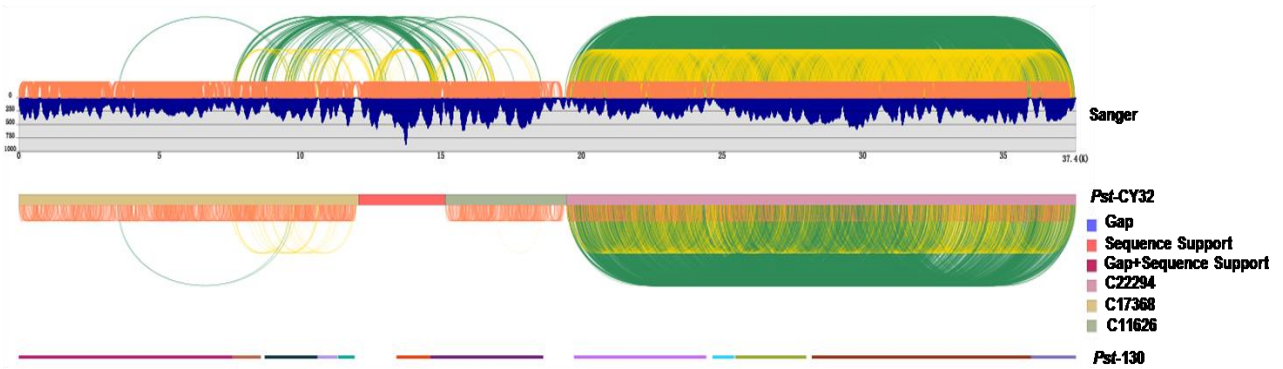

**h)**

**bjax**

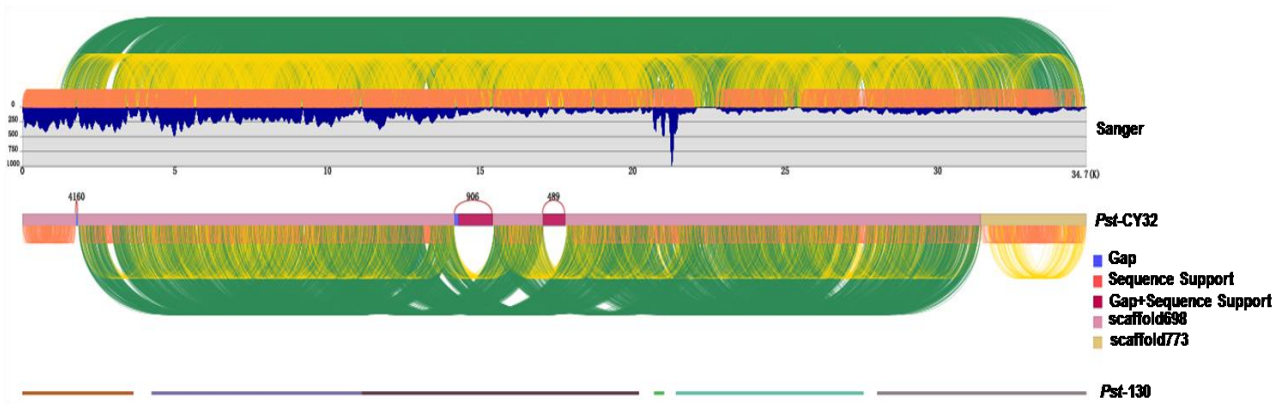

i)

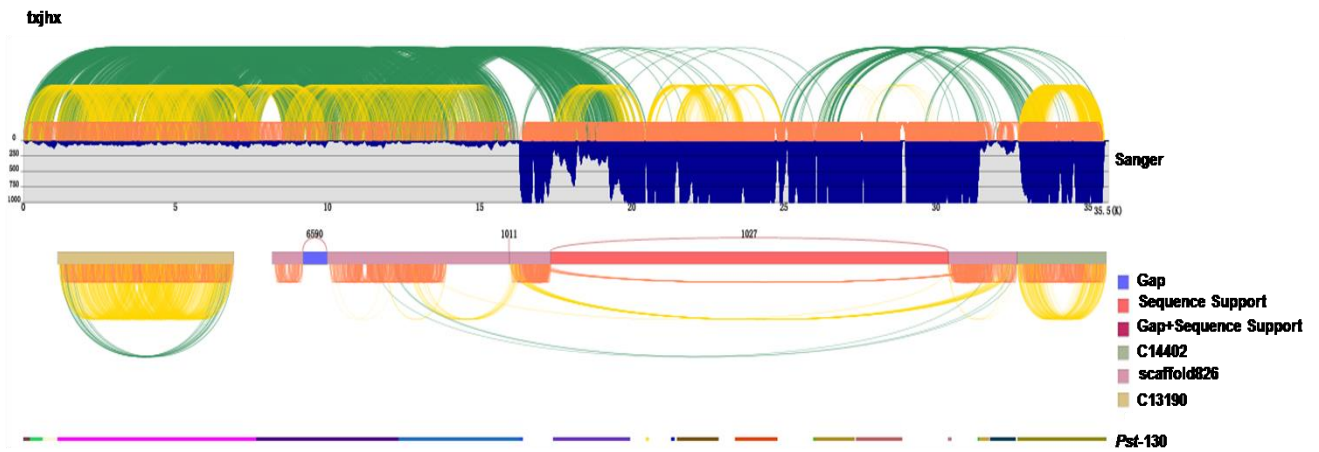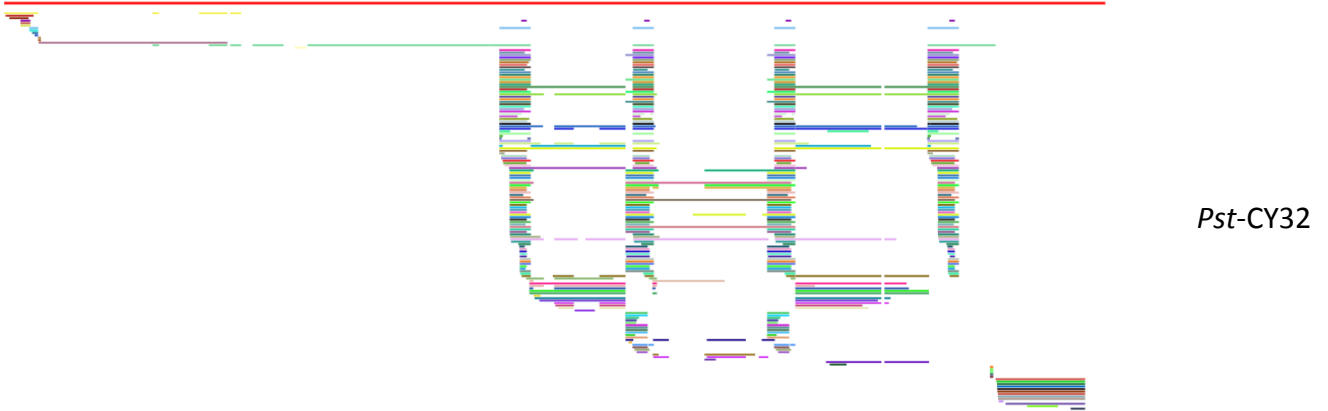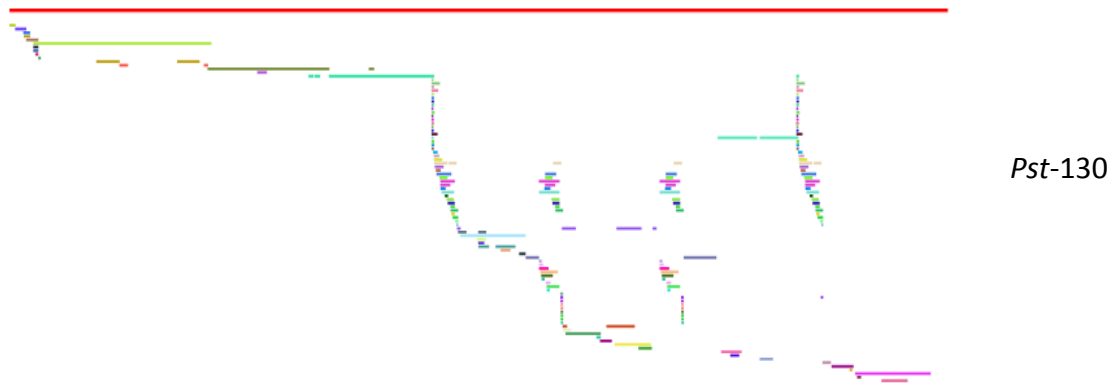

j)

txjbx

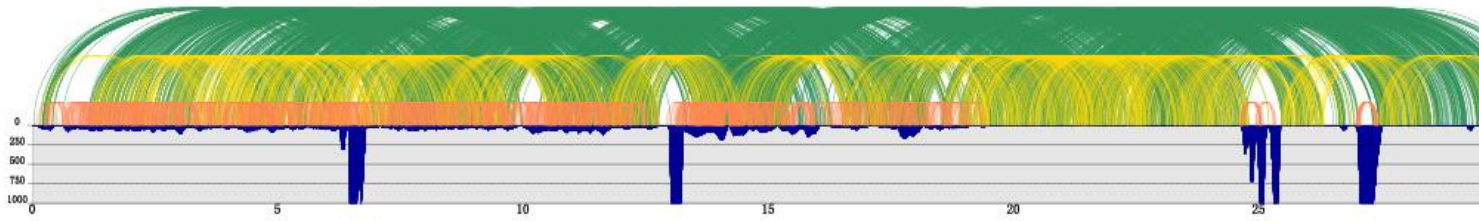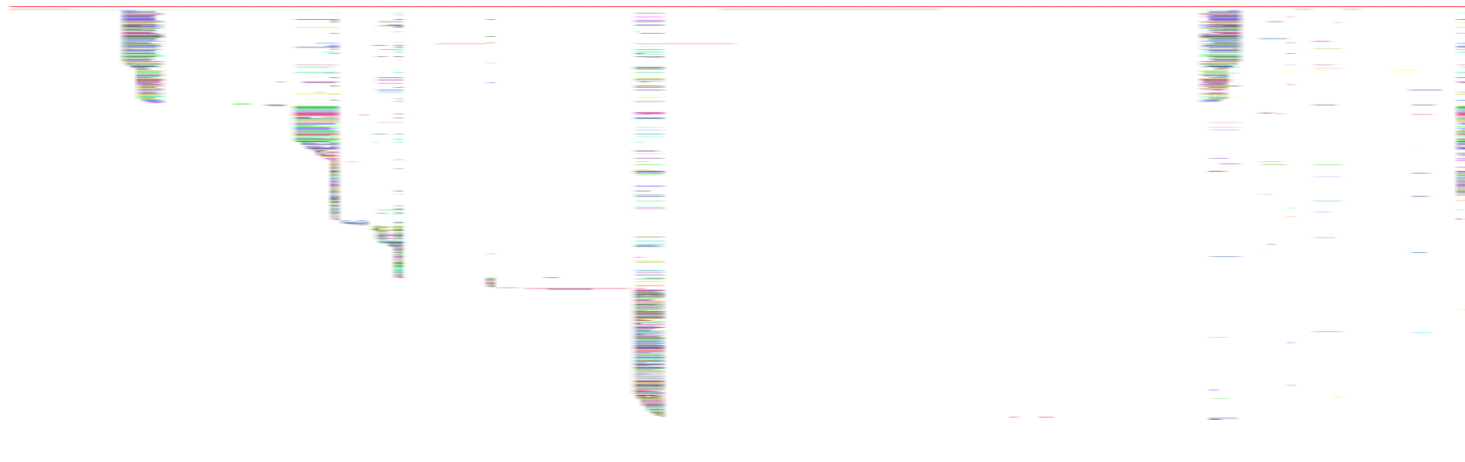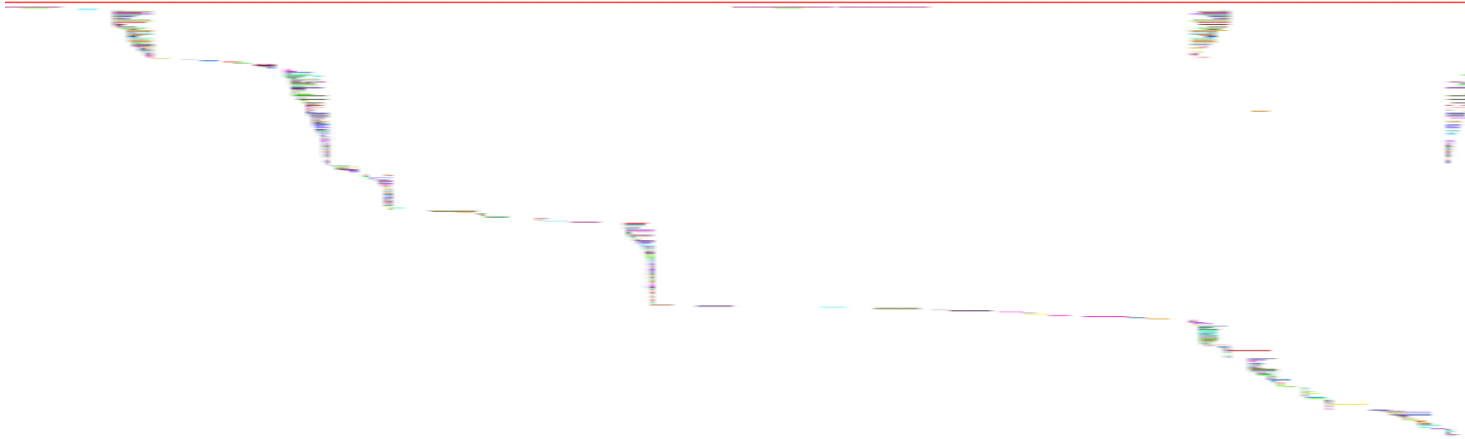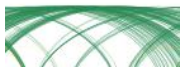

Paired-end supporting data from the 6-kb PE library.

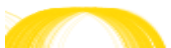

Paired-end supported data from the 2-kb PE library.

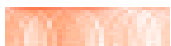

Paired-end supported data from the <1-kb PE library.

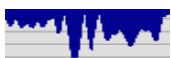

Coverage and depth of Sanger sequencing.

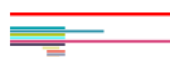

Unfiltered different contigs.



**Supplementary Fig. S4 | Evaluation of the *Pst*-CY32 genome assembly by mapping to fully Sanger sequenced 10 fosmid clones.** The quality of *Pst*-CY32 assembly was assessed by mapping scaffolds to fully sequenced fosmids and paired-end (PE) supporting data. Matching contigs from the *Pst*-130 genome were included to show the improved integrity of *Pst*-130 assembly. Validation results demonstrate that the *Pst*-CR32 assembly is highly confident (Average matched ratio reached 96%). In comparison with the *Pst*-130 assembly generated with conventional WGS Illumina sequencing data, the integrity increased on average 7.2 folds in fragment numbers. Some regions which could not be assembled well were represented in PE and/or sequence supported data, indicating a relative rational confidence. Some complicated regions, such as fosmid\_Txjbx, may be difficult to assemble due to highly repetitive sequences or SV regions related to genome heterozygosity.

- a) **Fosmid\_Txjkk.** Scaffold 475 of *Pst*-CY32 matched to Txjkk except for one 1,743-bp PE and sequence supported region (likely a SV existed). The same region consists of 11 contigs in the *Pst*-130 assembly using WGS Illumina sequencing data only.
- b) **Fosmid\_Txjex.** Scaffolds C19720 (with one 1,748-bp PE and sequence supported gap) and C19418 of *Pst*-CY32 matched to the region of Txjex that consists of 14 contigs in the *Pst*-130 assembly.
- c) **Fosmid\_Txjxx.** Scaffolds 62 (with two PE supported gaps) and C14402 of *Pst*-CY32 matched to Txjxx. The same region consists of 13 contigs in the *Pst*-130 assembly.
- d) **Fosmid\_Txjgx.** Scaffold 619 (with three sequence supported gaps) covers the entire length of Txjgx. The same region consists of 15 contigs in the *Pst*-130 genome assembled with WGS Illumina sequencing data.
- e) **Fosmid\_Txjfx.** Scaffolds 689 (two PE supported gaps), C19204, and C18874 (two PE supported gaps) of *Pst*-CY32 matched to the region of fosmid\_Txjfx that is represented by 15 contigs in the *Pst*-130 assembly.
- f) **Fosmid\_Txjdx.** Scaffold 509 with three PE or sequence supported gaps matched to the region of fosmid\_Txjdx that has 24 contigs in the *Pst*-130 assembly.
- g) **Fosmid\_Txjcx.** Scaffolds C22294, C17368, and C11626 of *Pst*-CY32 matched to the region of fosmid\_Txjcx that has 12 contigs in the *Pst*-130 assembly.
- h) **Fosmid\_Txjax.** Scaffolds 698 (with three gaps) and Scaffolds 773 of *Pst*-CY32 matched to the region of fosmid\_Txjax that has 6 contigs in the *Pst*-130 assembly.
- i) **Fosmid\_Txjhx.** Scaffolds 826, C14402, and C13190 of *Pst*-CY32 matched to fosmid\_Txjhx. Scaffold 826 have a 1K insertion and a 12K deletion in the 36309 to 37320 region which were supported by PE sequencing data. The same region consists of 19 contigs in the *Pst*-130 assembly. The dissection for unfiltered contigs of *Pst*-CY32 and *Pst*-130 matched to fosmid\_Txjhx shows that both the 1k insertion and 12k deletion regions are covered with unfiltered reads and have abnormal cover depth. Failure to assemble these unfiltered contigs resulted from its complexity, manifestly indicating it may be SV and high repetitive region.  
Red line showed correlative fosmid sequence.
- j) **Fosmid\_Txjbx.** No matching scaffolds of *Pst*-CY32 or contigs of *Pst*-130 aligned well to fosmid\_Txjbx. However, sequences from unfiltered contigs/scaffolds matched to small regions of Txjbx, of which some had abnormally high cover depth, indicating that these areas consist of highly repetitive or heterozygous sequences.

Data from the *Pst*-CY32 genome include contigs and scaffolds assembled with the ‘fosmid to fosmid’ approach, Illumina reads from ‘fosmid to fosmid’ sequencing for pair-end supporting analysis (PE library insert size 500-bp; average read length 93-bp; total PE sequence: 123,240,156-bp), and WGS Illumina reads from pair-end libraries with average insert size of 6-kb (864,513,496-bp), 2-kb (1256,790,128-bp), and <1-kb (5,490,267,014-bp). Sequencing data of the *Pst*-130 genome was cited from NCBI<sup>14</sup>.

The labels on the figure left are:

**Sanger:** randomly selected *Pst*-CY32 fosmids fully sequenced by Sanger sequencing.

***Pst*-CY32:** matching scaffolds in the *Pst*-CY32 genome assembly.

**Gap:** sequence gap within a scaffold;

**Sequence support:** absent sequence based on mapping fosmid with sequence assembled in other scaffold or contig;

**Gap+sequence support:** gap with sequence support.

***Pst*-130:** contigs of *Pst*-130 from WGS Illumina sequencing. Different colors represent different contigs.

High PE support density reflects high assembly confidence. Existed PE and sequence supported gap indicated this region may have SV (Structure variation) derived from genome heterozygosity or highly repetitive fragments.

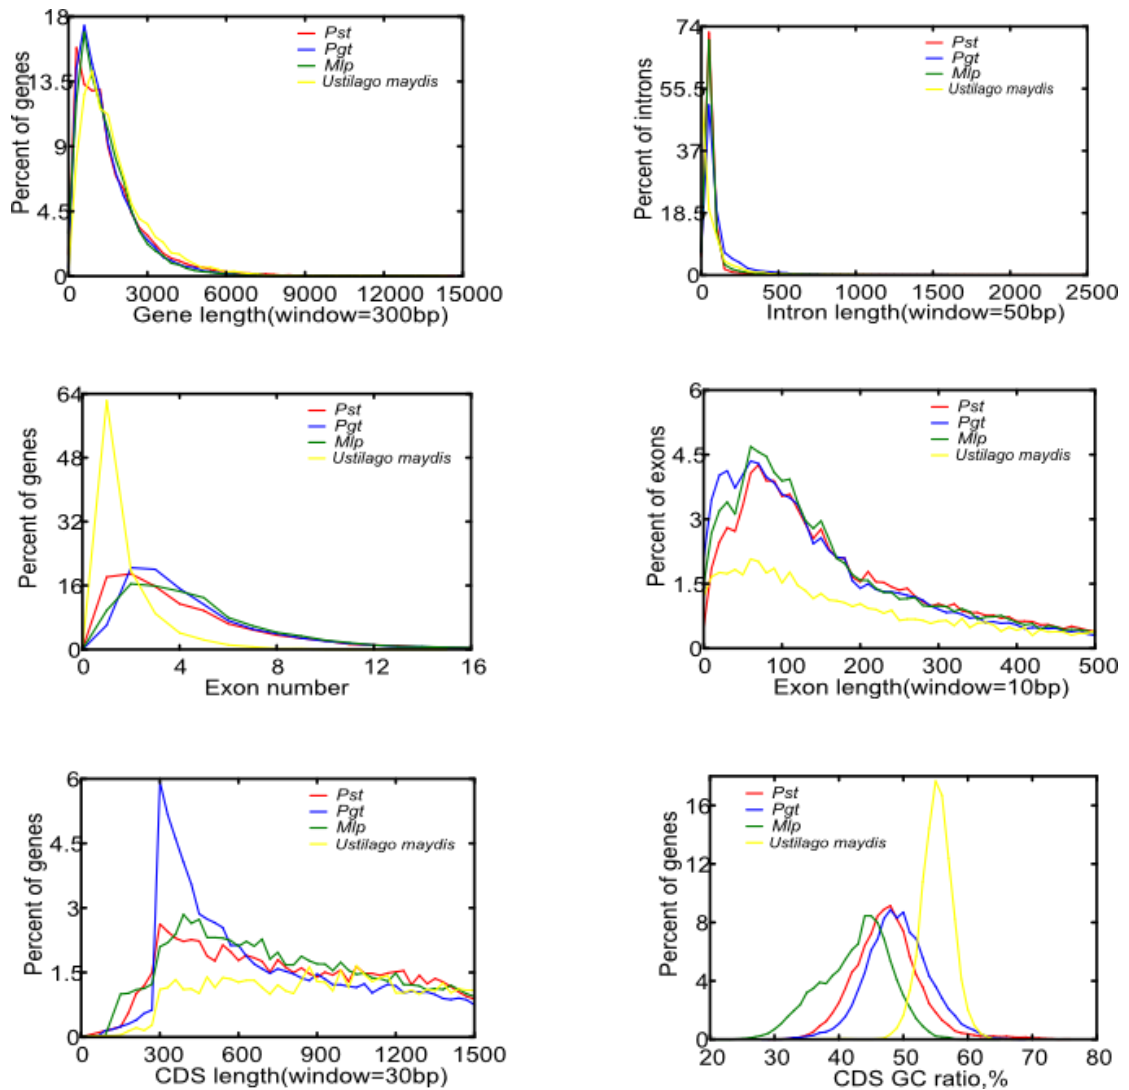

**Supplementary Fig. S5 | Comparison of the gene parameters among fungal genomes of three rust and common corn smut.** Six gene parameters were chosen for analysis: Plots of gene lengths, intron lengths, Exon numbers, Exon lengths, CDS lengths, and CDS GC ratios. No distinct differences were seen for *Pst* compared to the other rust fungi, suggesting that the *Pst* gene annotation is of high quality.

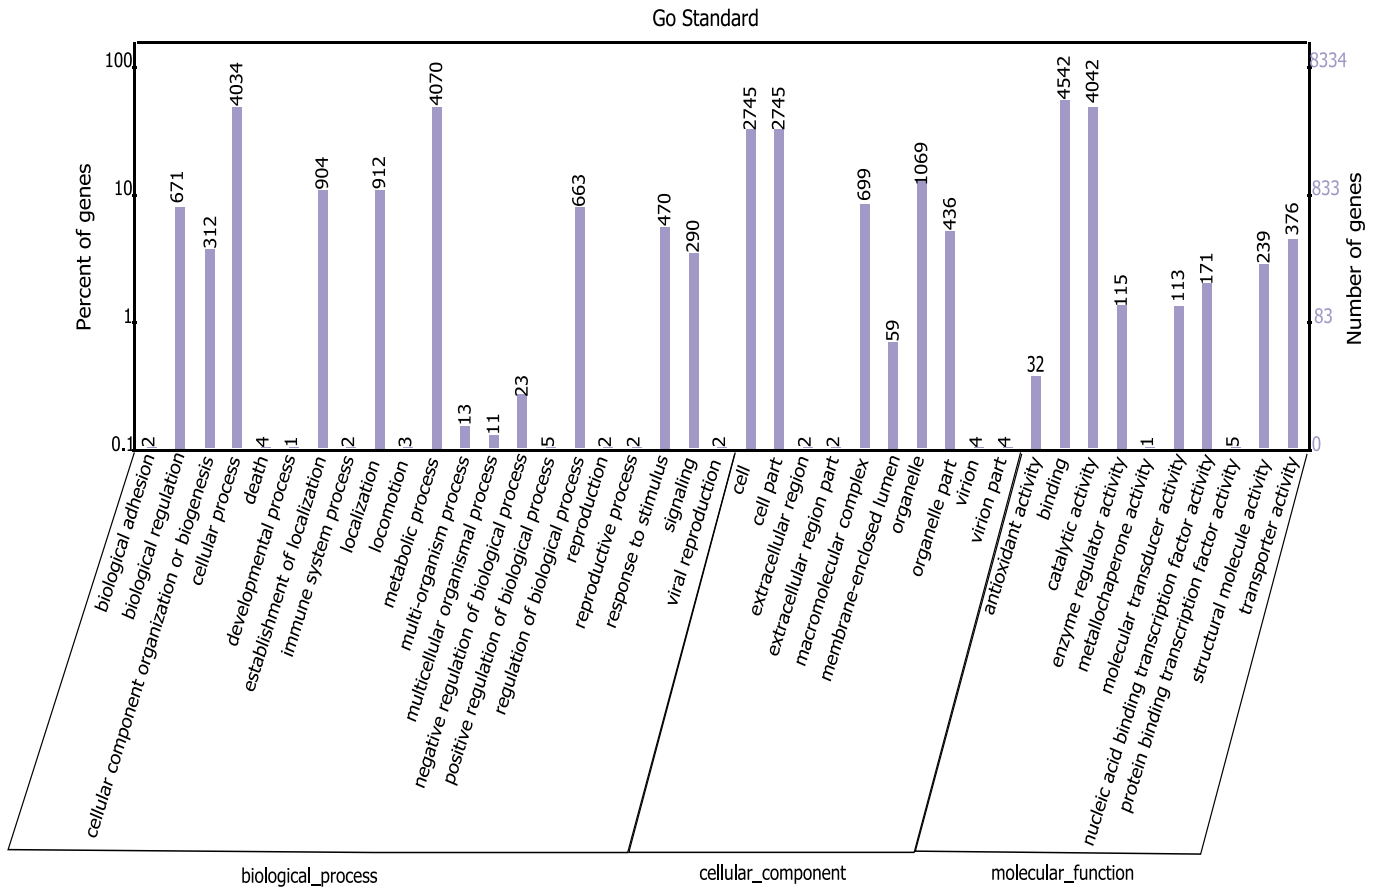

**Supplementary Fig. S6 | Functional categories and distribution of predicted *Pst* genes covered by GO database.**

The figure shows the numbers of predicted *Pst* genes belonging to different functional groups based on the GO database. Only about 33% of the predicted *Pst* genes (8,334 genes in total) have homologues with known functions in GO database. Among them, the groups of cellular process, metabolic process, binding, and catalytic activity are mostly in abundance.

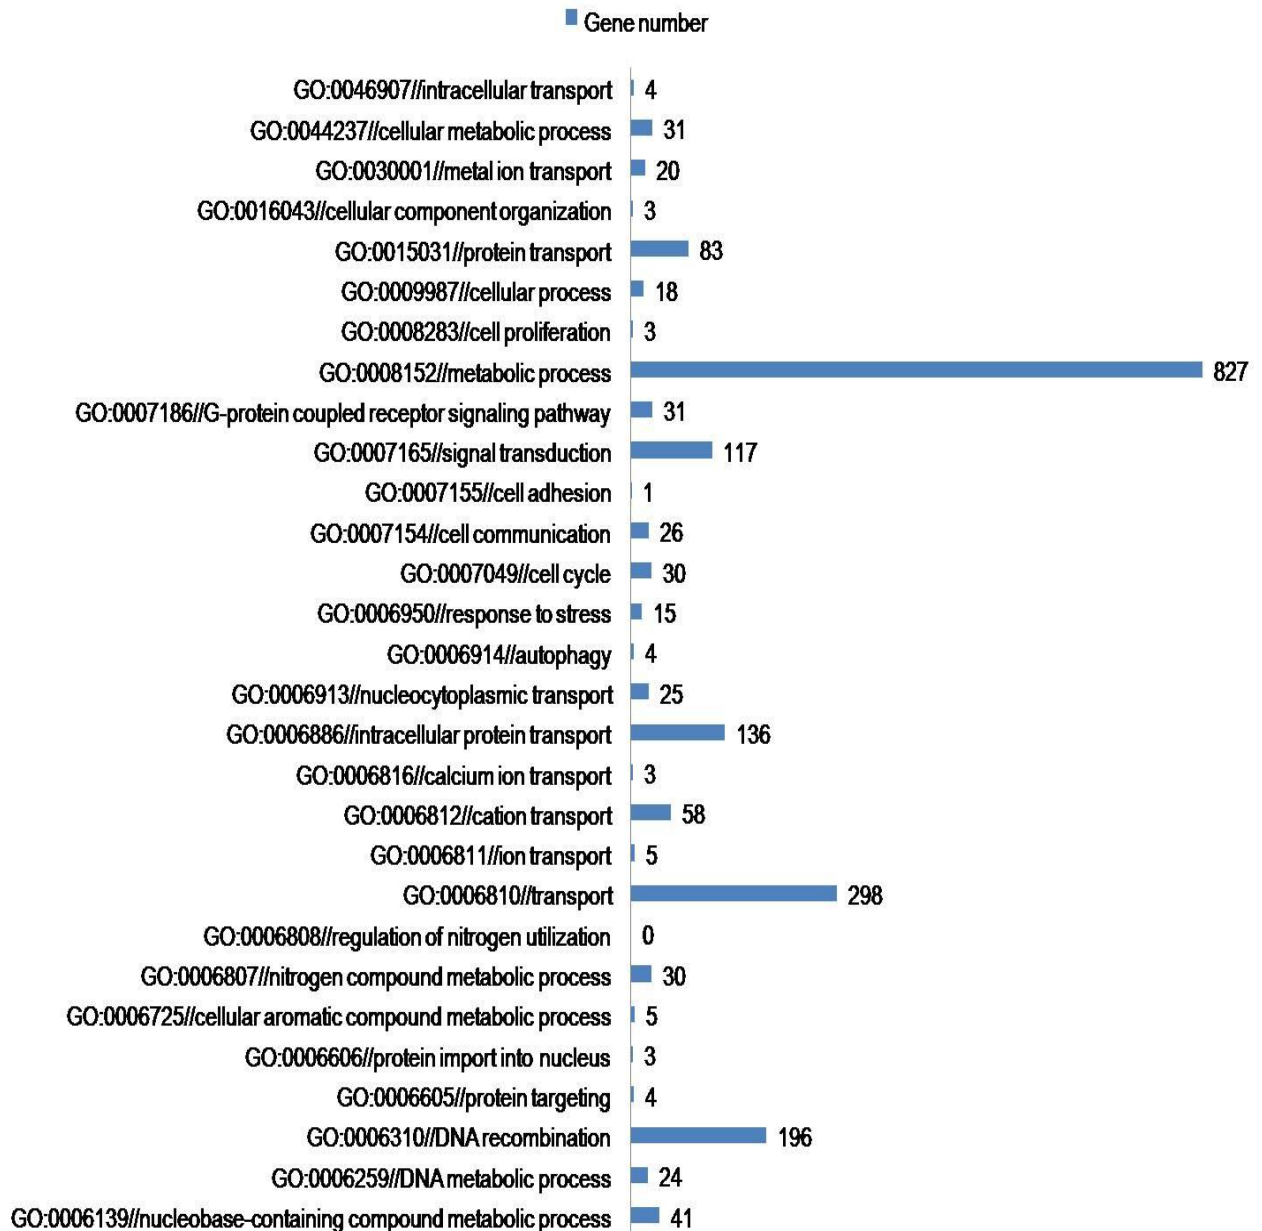

**Supplementary Fig. S7 | Functional categories and distribution of predicted *Pst* genes covered by PAMGO database.**

The result presented the numbers of predicted *Pst* genes belonging to different functional groups based on the PAMGO database. Remarkably *Pst* is found to be abundant in genes involved in DNA recombination, which might be related to its evolutionary adaptation to environmental stresses.

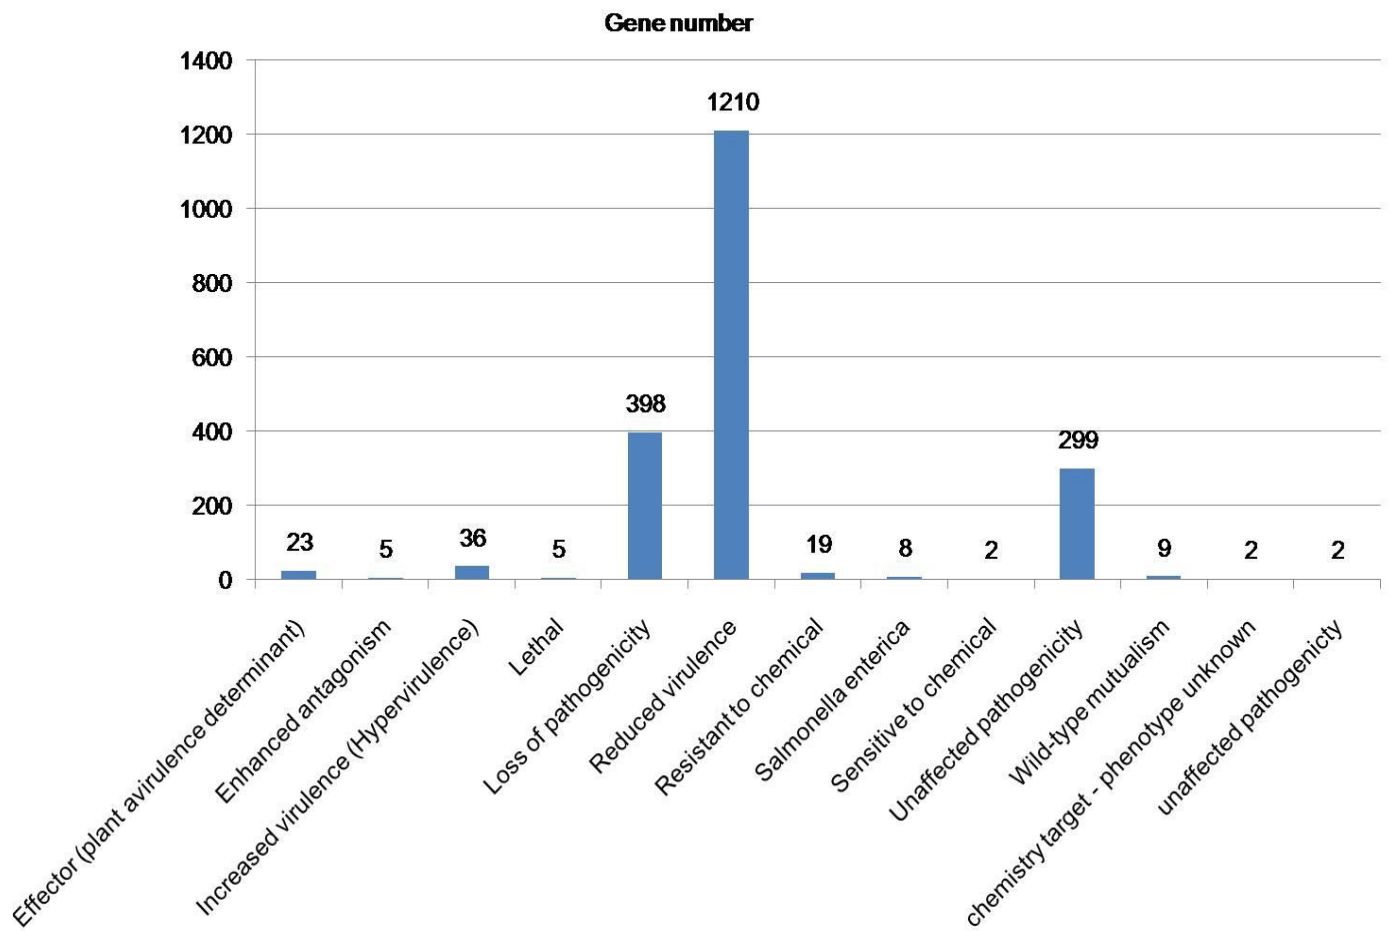

**Supplementary Fig. S8 | Functional categories and distribution of predicted *Pst* genes covered by PHI database.** The figure shows the numbers of predicted *Pst* genes belonging to different functional groups based on the PHI database. Only about 8% of the *Pst* genes (2,018 genes in total) are found to have the homologues with known function in PHI database, reflecting inadequate investigation of gene functions in rust pathogens. More than half of them are genes related to reduced virulence or loss of pathogenicity. These genes may play important role in the infection and development of rust pathogen.

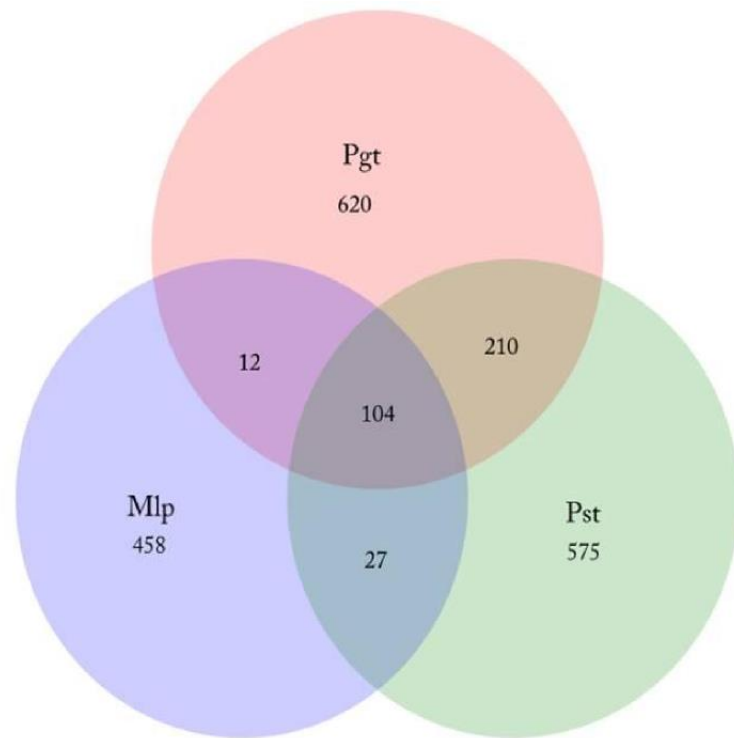

**Supplementary Fig. S9 | Venn diagram of putative secreted protein (SP) gene families among *Pst*, *Pgt* and *Mlp*.** Orthologous SP gene families were merged into multiple species orthologous groups by MultiParanoid.





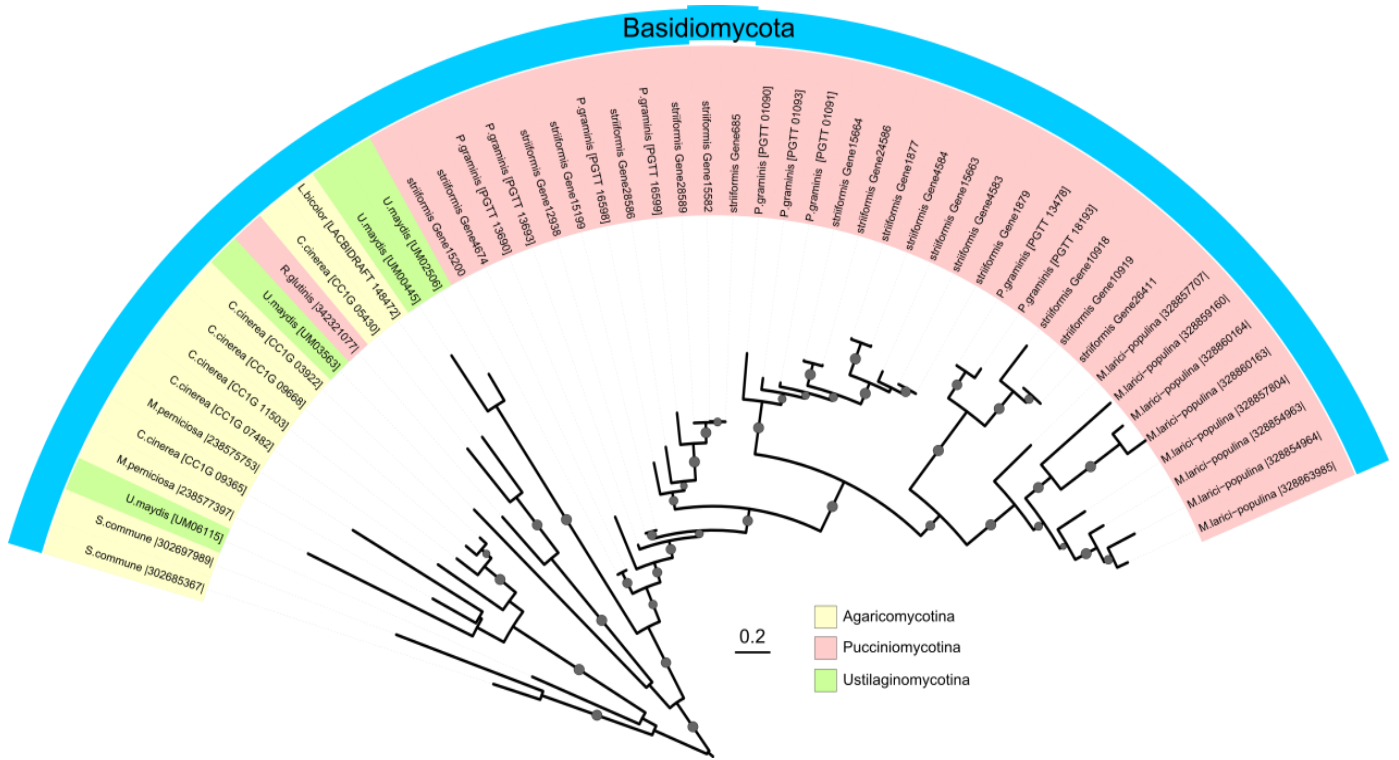

**Supplementary Fig. S11 | Family expansion of cutinase genes in three rust fungi.** Multiple alignments of amino acid sequences were constructed using COBALT ([www.ncbi.nlm.nih.gov/tools/cobalt/cobalt.cgi?link\\_loc=-BlastHomeAd](http://www.ncbi.nlm.nih.gov/tools/cobalt/cobalt.cgi?link_loc=-BlastHomeAd)) and manually edited. Maximum likelihood (ML) phylogenies were estimated by using program PhyML3.0 with the LG model. The reliability of internal branches was evaluated based on SH-aLRT supports. The midpoint rooted base tree was drawn using Interactive Tree Of Life Version 2.1.1 ([itol.embl.de](http://itol.embl.de)). The p-values of approximate likelihood ratios (SH-aLRT) plotted as circle marks on the branches and circle size is proportional to the p-values. Scale bars correspond to 0.2 amino acid substitutions per site. *L. bicolor*: *Laccaria bicolor*; *C. cinerea*: *Coprinopsis cinere*; *M. perniciosa*: *Moniliophthora perniciosa*; *S. commune*: *Schizophyllum commune*.

## Supplementary Tables

**Supplementary Table S1.** Sequencing data used in the 17 k-mer analysis

| PE Library | Insert size (bp) | Read length (bp) | Total sequence (Mb) | Q20 (%) |
|------------|------------------|------------------|---------------------|---------|
| XN-PE1     | 224              | 75, 75           | 1323.33             | 91.61   |
| XN-PE2     | 224              | 75, 75           | 1,238.37            | 79.69   |
| XN-PE3     | 311              | 44, 44           | 1417.21             | 93.27   |
| XN-PE4     | 515              | 75, 75           | 2403.55             | 83.66   |

**Supplementary Table S2.** Genome size estimation by 17 k-mer depth distribution

| K-mer number  | Pkdepth | Estimated<br>genome size (bp) | Used base | Used reads |
|---------------|---------|-------------------------------|-----------|------------|
| 3,215,565,577 | 16      | 200,972,843                   | 4.565E+09 | 84,323,652 |
| 3,215,565,577 | 30      | 107,185,519                   | 4.565E+09 | 84,323,652 |

**Supplementary Table S3.** Statistics of repeat contig rates given expected contig depth as 17

|               | Number    | Length (bp) | Repeat contigs | Repeat length<br>(bp) | Number ratio<br>(%) | Length ratio<br>(%) |
|---------------|-----------|-------------|----------------|-----------------------|---------------------|---------------------|
| Short contig* | 1,419,146 | 73,209,974  | 315,016        | 13,337,659            | 22.19               | 18.21               |
| Long contig   | 226,022   | 61,535,829  | 4,169          | 769,263               | 1.84                | 1.25                |
| Total contig  | 1,645,168 | 134,745,803 | 319,185        | 14,106,922            | 19.4                | 10.46               |

\*Short contig  $\leq 100$ -bp; Long contig  $\geq 100$ -bp.

**Supplementary Table S4.** Statistics of heterozygous contigs\*

|              | Number    | Length (bp) | Heterozygous<br>number | Heterozygous<br>length (bp) | Number ratio<br>(%) | Length ratio<br>(%) |
|--------------|-----------|-------------|------------------------|-----------------------------|---------------------|---------------------|
| Short contig | 1,419,146 | 73,209,974  | 451,475                | 28,408,974                  | 31.81               | 38.8                |
| Long contig  | 226,022   | 61,535,829  | 105,379                | 20,861,903                  | 46.62               | 33.9                |
| Total contig | 1,645,168 | 134,745,803 | 556,854                | 49,270,877                  | 33.84               | 36.56               |

\*Contigs with depth between 4 and 12 were considered as heterozygous fragments

**Supplementary Table S5.** Genome coverage of TE families (REPET consensus sequences) in *Pst* CY32.

| <b>TE component</b>                 | <b>TE component length</b> | <b>Coverage relative to genome (%)</b> |
|-------------------------------------|----------------------------|----------------------------------------|
| Class II (DNA transposons):TIR      | 18,261,748                 | 16.60                                  |
| Class II (DNA transposons):Maverick | 129,063                    | 0.12                                   |
| Class II (DNA transposons):Helitron | 1,085,922                  | 0.99                                   |
| Class I (retrotransposons):LTR      | 29,885,541                 | 27.17                                  |
| Class I (retrotransposons):DIRS     | 945,078                    | 0.86                                   |
| Class I (retrotransposons):SINE     | 0                          | 0                                      |
| Class I (retrotransposons):PLE      | 0                          | 0                                      |
| Class I (retrotransposons):LINE     | 371,650                    | 0.34                                   |
| noCat: noCat *                      | 1,101,404                  | 1.00                                   |
| <b>Total</b>                        | <b>53,799,116</b>          | <b>48.91</b>                           |

\* Consensus sequences without any known structure or similarity were classified as “NoCat”

**Supplementary Table S6.** Genome coverage of TE families (REPET consensus sequences) in *Pgt*.

| <b>TE component</b>                 | <b>TE component length</b> | <b>Coverage relative to genome (%)</b> |
|-------------------------------------|----------------------------|----------------------------------------|
| Class II (DNA transposons):TIR      | 14,758,804                 | 16.65                                  |
| Class II (DNA transposons):Maverick | 506                        | 0.00                                   |
| Class II (DNA transposons):Helitron | 1,339,916                  | 1.51                                   |
| Class I (retrotransposons):LTR      | 25,901,650                 | 29.22                                  |
| Class I (retrotransposons):DIRS     | 1,385,587                  | 1.56                                   |
| Class I (retrotransposons):SINE     | 16,492                     | 0.02                                   |
| Class I (retrotransposons):PLE      | 410                        | 0.00                                   |
| Class I (retrotransposons):LINE     | 1,026,360                  | 1.16                                   |
| noCat: noCat                        | 310,170                    | 0.35                                   |
| Total                               | 42,160,698                 | 47.56                                  |

\* Consensus sequences without any known structure or similarity were classified as “NoCat”

**Supplementary Table S7.** Genome coverage of TE families (REPET consensus sequences) in *Mlp*.

| <b>TE component</b>                 | <b>TE component length</b> | <b>Coverage relative to genome (%)</b> |
|-------------------------------------|----------------------------|----------------------------------------|
| Class II (DNA transposons):TIR      | 19,789,406                 | 19.57                                  |
| Class II (DNA transposons):Maverick | 181,956                    | 0.18                                   |
| Class II (DNA transposons):Helitron | 1,087,075                  | 1.07                                   |
| Class I (retrotransposons):LTR      | 26,009,398                 | 25.72                                  |
| Class I (retrotransposons):DIRS     | 5,199,656                  | 5.14                                   |
| Class I (retrotransposons):SINE     | 12,383                     | 0.01                                   |
| Class I (retrotransposons):PLE      | 1,960                      | 0.00                                   |
| Class I (retrotransposons):LINE     | 1,526,312                  | 1.51                                   |
| noCat: noCat                        | 131,580                    | 0.13                                   |
| Total                               | 49,885,177                 | 49.33                                  |

\* Consensus sequences without any known structure or similarity were classified as “NoCat”



**Supplementary Table S8. Statistics of assembled *Pst*-CY32 scaffolds matching to 10 fully Sanger-sequenced fosmids.**

| Fosmid  | Length<br>(bp) | Match length<br>(bp) | Match Ratio<br>(%) | Reads coverage<br>(bp) |
|---------|----------------|----------------------|--------------------|------------------------|
| txjax   | 34,727         | 34,429               | 99.14              | 34,236                 |
| txjbx   | 30,801         | 24,814               | 80.56              | 22,664                 |
| txjcx   | 37,427         | 37,060               | 99.02              | 37,331                 |
| txjdx   | 43,291         | 42,117               | 97.29              | 43,189                 |
| txjex   | 34,991         | 34,788               | 99.42              | 34,990                 |
| txjfx   | 38,327         | 37,166               | 96.97              | 37,657                 |
| txjgx   | 33,824         | 33,727               | 99.71              | 33,823                 |
| txjhx   | 35,527         | 34,296               | 96.54              | 35,307                 |
| txjjx   | 34,949         | 34,591               | 98.98              | 34,946                 |
| txjkx   | 37,773         | 36,984               | 97.91              | 37,807                 |
| Average | 36,250         | 35,707               | 98.53              | 36,022                 |

**Supplementary Table S9. Coverage of ESTs in the *Pst*-CY32 assembly.**

| EST Dataset<br>(bp) | Number | Total Length<br>(bp) | Bases<br>covered by<br>assembly (%) | Sequences<br>covered by<br>assembly (%) | >90% sequences<br>in one scaffold |         | >50% sequence<br>in one scaffold |         |
|---------------------|--------|----------------------|-------------------------------------|-----------------------------------------|-----------------------------------|---------|----------------------------------|---------|
|                     |        |                      |                                     |                                         | Number                            | Percent | Number                           | Percent |
| >100                | 1,861  | 955,468              | 92.84                               | 98.44                                   | 1,350                             | 72.54   | 1,804                            | 96.94   |
| >200                | 1,808  | 946,058              | 92.94                               | 98.51                                   | 1,334                             | 73.78   | 1,753                            | 96.96   |
| >500                | 1,023  | 648,732              | 94.34                               | 98.92                                   | 884                               | 86.41   | 999                              | 97.65   |
| >1000               | 39     | 45,402               | 95.71                               | 100                                     | 34                                | 87.18   | 39                               | 100     |

**Supplementary Table S10. Statistics of the completeness of the genome based on 248 CEGs #**

|          | Prots | %Completeness | - | Total | Average | %Ortho |
|----------|-------|---------------|---|-------|---------|--------|
| Complete | 226   | 91.13         | - | 458   | 2.03    | 71.24  |
| Group 1  | 55    | 83.33         | - | 119   | 2.16    | 76.36  |
| Group 2  | 52    | 92.86         | - | 96    | 1.85    | 63.46  |
| Group 3  | 59    | 96.72         | - | 124   | 2.10    | 77.97  |
| Group 4  | 60    | 92.31         | - | 119   | 1.98    | 66.67  |
| Partial  | 233   | 93.95         | - | 522   | 2.24    | 76.82  |
| Group 1  | 58    | 87.88         | - | 130   | 2.24    | 79.31  |
| Group 2  | 53    | 94.64         | - | 106   | 2.00    | 67.92  |
| Group 3  | 60    | 98.36         | - | 141   | 2.35    | 81.67  |
| Group 4  | 62    | 95.38         | - | 145   | 2.34    | 77.42  |

# These results are based on the set of genes selected by Genis Parra et al.<sup>21</sup>

Key:

Prots = number of 248 ultra-conserved CEGs present in genome

%Completeness = percentage of 248 ultra-conserved CEGs present

Total = total number of CEGs present including putative orthologs

Average = average number of orthologs per CEG

%Ortho = percentage of detected CEGs that have more than 1 ortholog

**Supplementary Table S11.** Main cell wall hydrolyzing enzymes of plant biotrophic, hemibiotrophic and necrotrophic fungal pathogens

| Fungi                     | Cutinase | Pectinases    |              |                 | Cellulase         |    |     | Hemicellulases |          |           |
|---------------------------|----------|---------------|--------------|-----------------|-------------------|----|-----|----------------|----------|-----------|
|                           |          | Pectate lyase | Pectin lyase | Pectin esterase | Polygalacturonase | EG | CBH | BG             | Xylanase | Mannanase |
| <i>P. striiformis</i>     | 18       | 1             | 1            | 9               | 2                 | 33 | 9   | 2              | 11       | 23        |
| <i>P. graminis</i>        | 9        | 0             | 3            | 7               | 1                 | 19 | 8   | 2              | 7        | 15        |
| <i>M. larici-populina</i> | 8        | 0             | 3            | 3               | 3                 | 20 | 3   | 2              | 6        | 11        |
| <i>U. maydis</i>          | 4        | 0             | 1            | 1               | 1                 | 15 | 0   | 3              | 5        | 1         |
| <i>B. graminis</i>        | 2        | 0             | 0            | 0               | 0                 | 4  | 0   | 1              | 0        | 7         |
| <i>F. graminearum</i>     | 12       | 7             | 9            | 3               | 6                 | 33 | 3   | 20             | 26       | 8         |
| <i>Laccaria bicolor</i>   | 1        | 0             | 0            | 3               | 7                 | 3  | 0   | 2              | 0        | 1         |

**Description:** EG, endo-1,4- $\beta$ -D-glucanase; BG,  $\beta$ -1,4- glucosidase; CBH, exo-1,4- $\beta$ -D-glucanase

**Supplementary Table S12. Virulence of *Pst* strains used for re-sequencing**

| wheat differentials | containing      |                    |                  |                       |              |                     |              |                      |
|---------------------|-----------------|--------------------|------------------|-----------------------|--------------|---------------------|--------------|----------------------|
|                     | resistant genes | PK-CDRD (Pakistan) | Hu09-2 (Hungary) | 104E137A- (Australia) | CY23 (China) | <i>Pst</i> -78 (US) | CY32 (China) | <i>Pst</i> -130 (US) |
| AVS/6*Yr1           | <i>Yr1</i>      | R                  | R                | R                     | R            | R                   | S            | R                    |
| AVS/6*Yr2           | <i>Yr2</i>      | R                  | R                | R                     | R            | S                   | S            | S                    |
| AVS/6*Yr5           | <i>Yr5</i>      | R                  | R                | R                     | R            | R                   | R            | R                    |
| AVS/6*Yr6           | <i>Yr6</i>      | S                  | S                | S                     | S            | S                   | S            | S                    |
| AVS/6*Yr7           | <i>Yr7</i>      | S                  | S                | S                     | R            | S                   | S            | S                    |
| AVS/6*Yr8           | <i>Yr8</i>      | S                  | S                | S                     | S            | S                   | S            | S                    |
| AVS/6*Yr9           | <i>Yr9</i>      | R                  | R                | R                     | R            | S                   | S            | S                    |
| AVS/6*Yr10          | <i>Yr10</i>     | R                  | R                | R                     | R            | R                   | S            | S                    |
| AVS/6*Yr15          | <i>Yr15</i>     | R                  | R                | R                     | R            | R                   | S            | R                    |
| AVS/6*Yr17          | <i>Yr17</i>     | R                  | R                | R                     | R            | S                   | R            | R                    |
| AVS/6*Yr18          | <i>Yr18</i>     | S                  | S                | S                     | R            | R                   | R            | S                    |
| AVS/6*Yr24          | <i>Yr24</i>     | R                  | R                | R                     | R            | R                   | R            | R                    |
| AVS/6*Yr26          | <i>Yr26</i>     | S                  | R                | S                     | R            | R                   | R            | R                    |
| AVS/6*Yr27          | <i>Yr27</i>     | R                  | R                | R                     | R            | R                   | R            | R                    |
| AVS/6*Yr28          | <i>Yr28</i>     | R                  | R                | S                     | R            | R                   | S            | R                    |
| AVS/6*Yr29          | <i>Yr29</i>     | S                  | R                | R                     | R            | R                   | R            | R                    |
| AVS/6*YrSp          | <i>YrSp</i>     | R                  | S                | R                     | R            | R                   | S            | S                    |

\* R,resistant (avirulent); S, susceptible (virulent). Virulence of *Pst*-130 was cited from literature.

**Supplementary Table S13. Depth and coverage statistics of re-sequenced isolates and *Pst*-130**

| <b>Isolates</b>  | <b>Map_ratio</b> | <b>Unmap_ratio</b> | <b>Cover_ratio*</b> | <b>Average depth</b> |
|------------------|------------------|--------------------|---------------------|----------------------|
| CY23             | 84.39            | 4.04               | 95.43               | 28.94                |
| PK-CDRD          | 84.32            | 4.11               | 95.35               | 27.3                 |
| <i>Pst</i> -78   | 84.33            | 4.1                | 95.36               | 25.09                |
| Hu09-2           | 84.32            | 4.11               | 95.35               | 22.8                 |
| 104E137A-        | 84.38            | 4.05               | 95.42               | 22.24                |
| <i>Pst</i> -130* | 83.64            | 4.79               | 94.58               | 24.83                |

\* Cover\_ratio was calculated for the ratio of reads covered length excluding gaps in reference genome assembly (gap-ratio, 11.57%).

※Sequencing data of *Pst*-130 was downloaded from NCBI.

**Supplementary Table S14. InDel types revealed by re-sequencing.**

| Strain    | Total InDel | Homo* |          | Hetero |          | Gene Region |
|-----------|-------------|-------|----------|--------|----------|-------------|
|           |             | Num   | Rate (%) | Num    | Rate (%) | CDS         |
| CY23      | 1,665       | 935   | 56.16    | 730    | 43.84    | 316         |
| 104E137A- | 1,990       | 929   | 46.68    | 1,061  | 53.32    | 168         |
| PK-CDRD   | 1,799       | 957   | 53.2     | 842    | 46.8     | 154         |
| Pst-78    | 1,849       | 914   | 49.43    | 935    | 50.57    | 160         |
| Hu09-2    | 2,011       | 958   | 47.64    | 1,053  | 52.36    | 177         |

\*Homo, homological SNP; Hetero, heterozygous SNP; CDS, coding sequence.

**Supplementary Table S15. SV types revealed by re-sequencing.**

| Strain         | Total | Insertion |          | Deletion |          | Complex |          |
|----------------|-------|-----------|----------|----------|----------|---------|----------|
|                |       | Number    | Rate (%) | Number   | Rate (%) | Number  | Rate (%) |
| CY23           | 631   | 0         | 0        | 631      | 100      | 0       | 0        |
| 104E137A-      | 695   | 221       | 31.8     | 474      | 68.2     | 0       | 0        |
| PK-CDRD        | 809   | 178       | 22       | 629      | 77.75    | 2       | 0.25     |
| <i>Pst</i> -78 | 838   | 211       | 25.18    | 627      | 74.82    | 0       | 0        |
| Hu09-2         | 823   | 143       | 17.38    | 680      | 82.62    | 0       | 0        |



## Supplementary Note 1

### Estimation of the *Pst* genome size by k-mer analysis

Sequence data from 4 pair-end (PE) libraries (Supplementary Table S1) were used for the k-mer 17 frequency distribution analysis. The size of the genome was estimated by establishing the frequency of occurrence of each 17-bp k-mer (a unique sequence of k (that is, 17) nucleotides in length) within the genomic sequence data set (from the 224-bp, 311-bp and 515-bp libraries). Genome size was estimated using a modification of the Lander–Waterman algorithm, where the haploid genome length in base pairs is  $G = (N \times (L - K + 1) - B)/D$ , where N is the read length sequenced in base pairs, L is the mean length of sequence reads, K is the k-mer length (17 bp), B is the number of k-mers occurring less than four times and D is the peak value of k-mer.

The 17 K-mer depth distribution of WGS Illumina reads presented two peaks (Figure 2A). The estimated genome size of *Pst* was approximately 200- or 107-Mb (Supplementary Table S2) depending on whether 16 or 30 was considered as the main peak, indicating that the two haploid nuclei of dikaryotic urediniospores differ significantly in genome sequences.

## Supplementary Note 2

### Estimation of the *Pst* genome size by contig frequency analysis

Contigs were preliminarily assembled by using SOAPdenovo 31-mer parameters. Based on the statistic results for assembled contigs length and depth, contigs longer than 1,000 bp were selected for calculating average depth and used as the average depth of the genome (AvgCvg: average coverage). Two peaks of Cvg (7 and 17) were identified in the distribution of contig length and depth (Figure 2B). Consider that the *Pst* genome has heterozygous phenomenon, the expected depth of contigs would be 17. Contigs with depth  $\geq 34$  are the repetitive contigs. Given the species has heterozygous nature, its contig repetitive level is acceptable (Supplementary Table S3) and has a certain number of heterozygous regions with a combined length of approximately 24.6 Mb (49,270,877/2). The length of the non-heterozygous regions accounts for approximately 85.4 Mb (134,745,803 - 49,270,877-bp), including repetitive regions of 14.1 Mb and unique regions of 57.2 Mb (Supplementary Table S4). Therefore, the haploid genome size of *Pst* was estimated to be approximately **110 Mb** (24.5 +85.4 =109.9 Mb).

The results here together with that of Fig. 2, Supplementary Fig. S2, and Supplementary Note 1 indicate the dikaryotic *Pst* genome is highly heterozygous, its genome size is estimated to be approximately 110 Mb.
